# Supplementary material
Source: ML conference proceedings conference paper supplement (https://proceedings.neurips.cc/paper_files/paper/2008/hash/eb160de1de89d9058fcb0b968dbbbd68-Abstract.html)

Lattice A, reduced labeling on the stimuli, full labeling on the cells

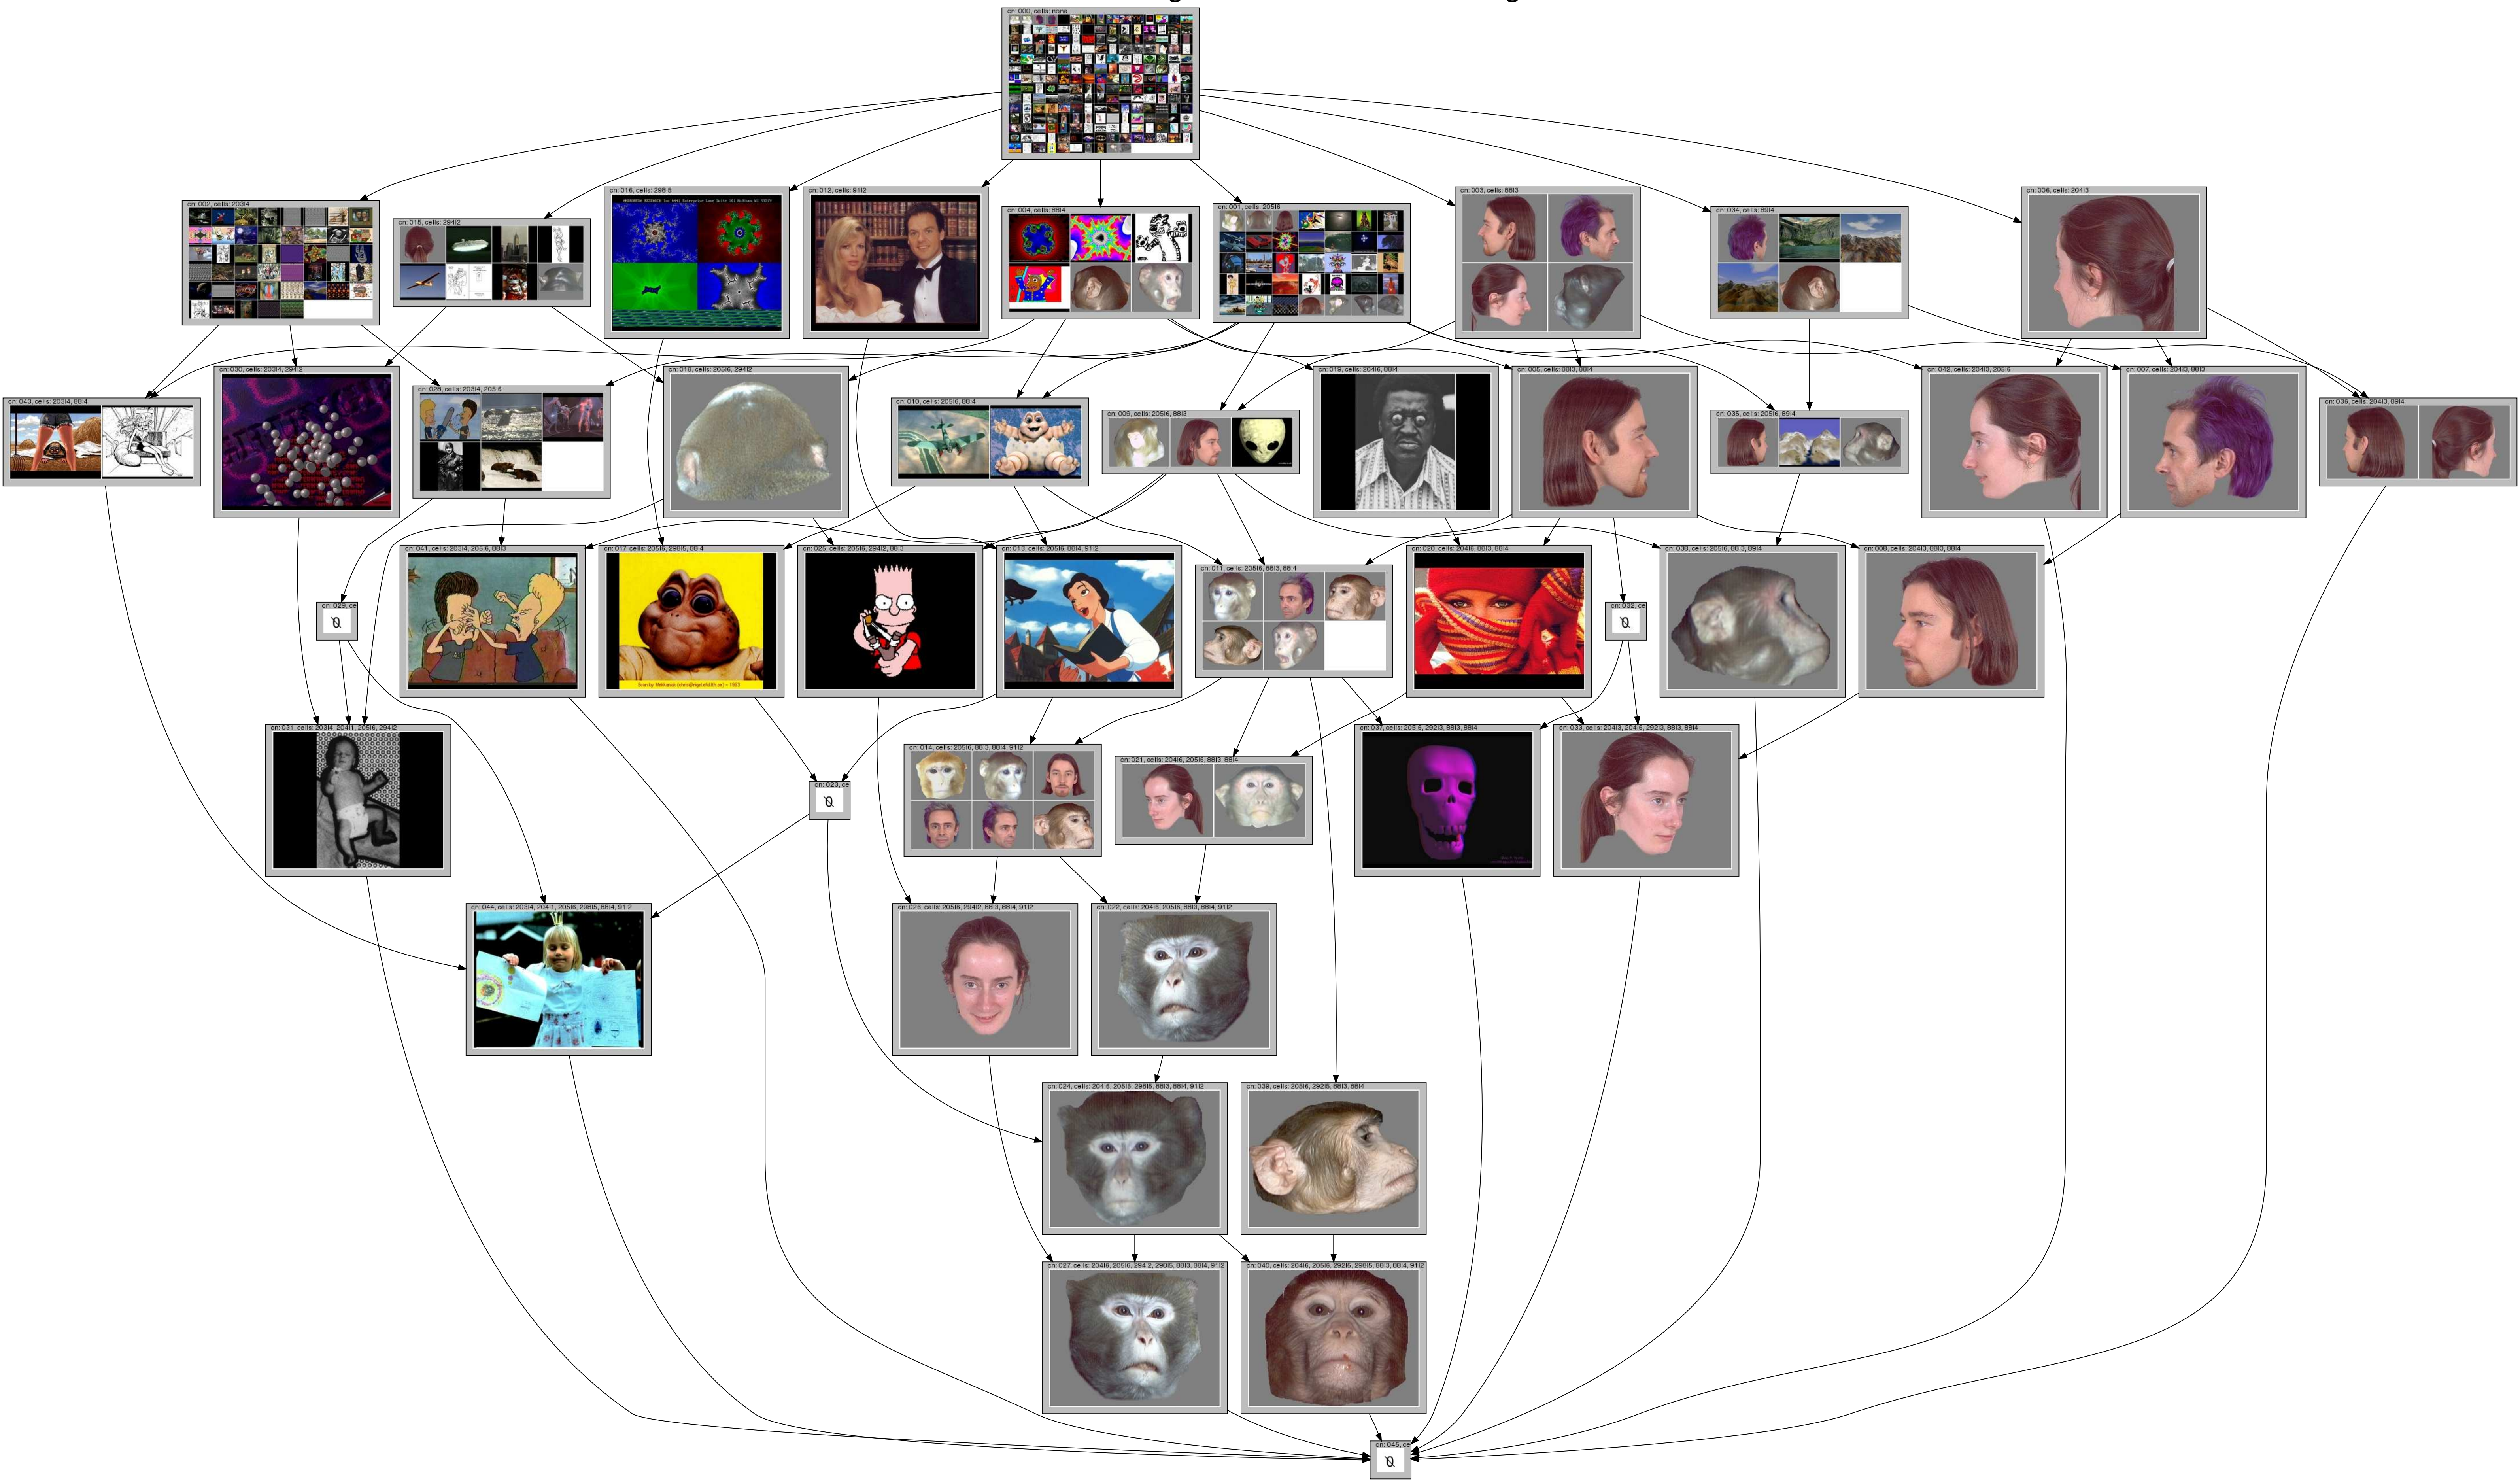

Supplement: Supplementary file [file eb160de1de89d9058fcb0b968dbbbd68-Supplemental.zip]
